# Supplementary material for: The impact of inconsistent human annotations on AI driven clinical decision making
Source: PubMed Central journal article supplement (PMC9944930; doi:10.1038/s41746-023-00773-3), 2023-02-21
Supplement: 41746_2023_773_MOESM1_ESM.pdf [file 41746_2023_773_MOESM1_ESM.pdf]

## Supplementary Tables & Figures

| Class label | Description                                                                                                                                                                                                                                                                                                                                                                                                                                                                                                                                                                                                                                                                                                       |
|-------------|-------------------------------------------------------------------------------------------------------------------------------------------------------------------------------------------------------------------------------------------------------------------------------------------------------------------------------------------------------------------------------------------------------------------------------------------------------------------------------------------------------------------------------------------------------------------------------------------------------------------------------------------------------------------------------------------------------------------|
| A           | Patient's cardiovascular system (CVS) normal, with no adrenaline or noradrenaline and low levels of oxygen; urine production often essentially normal (or is well established on renal replacement therapy).                                                                                                                                                                                                                                                                                                                                                                                                                                                                                                      |
| B           | Patient CVS nearly normal, probably needs low levels of adrenaline or noradrenaline and oxygen.                                                                                                                                                                                                                                                                                                                                                                                                                                                                                                                                                                                                                   |
| C           | Patient CVS system is effectively stable; probably on moderate dosages of adrenaline or noradrenaline and oxygen.<br>Most parameters suggest the time-slot is in category A or B, but if any of the following conditions are met, then it should be assigned to category C:<br><ul style="list-style-type: none"> <li>- heart rate: moderately low or moderately high;</li> <li>- MAP: moderately low or moderately high;</li> <li>- adrenaline: moderate dose;</li> <li>- noradrenaline: moderate dose;</li> <li>- FiO2: moderate;</li> <li>- SpO2: moderately low.</li> </ul>                                                                                                                                   |
| D           | Patient's CVS system is moderately unstable and/or on high doses of adrenaline or noradrenaline or fluid to retain stability.<br>Most parameters suggest the time-slot is in category A or B, but if any of the following conditions are met, then it should be assigned to category D:<br><ul style="list-style-type: none"> <li>- heart rate: low or high;</li> <li>- MAP: low or high;</li> <li>- adrenaline: high dose;</li> <li>- noradrenaline: high dose;</li> <li>- FiO2: high;</li> <li>- SpO2: low.</li> </ul>                                                                                                                                                                                          |
| E           | Patient's CVS is very unstable (which is usually true in early phases of resuscitation or following a new event) with low BP and high HR or rapidly changing adrenaline or noradrenaline dosage and requires substantial fluid inputs.<br>Most parameters suggest the time-slot is in category A or B, but if any of the following conditions are met, then it should be assigned to category E:<br><ul style="list-style-type: none"> <li>- heart rate: extremely low or extremely high;</li> <li>- MAP: extremely low or extremely high;</li> <li>- adrenaline: extremely high dose;</li> <li>- noradrenaline: extremely high dose;</li> <li>- FiO2: extremely high;</li> <li>- SpO2: extremely low.</li> </ul> |

**Supplementary Table 1. High-level description of the ICU-PSS scale.**

| Annotator | Internal Val. | External Val. |
|-----------|---------------|---------------|
|           | F1 micro      | F1 micro      |
| C1        | 0.600         | 0.262         |
| C2        | 0.750         | 0.541         |
| C3        | 0.650         | 0.328         |
| C4        | 0.700         | 0.425         |
| C5        | 0.583         | 0.230         |
| C6        | 0.517         | 0.175         |
| C7        | 0.550         | 0.358         |
| C8        | 0.800         | 0.423         |
| C9        | 0.583         | 0.430         |
| C10       | 0.650         | 0.168         |
| C11       | 0.567         | 0.302         |

**Supplementary Table 2. Internal and external validation performance of the Random Forest models across all 11 consultants (C1-C11), using balanced class weights.**

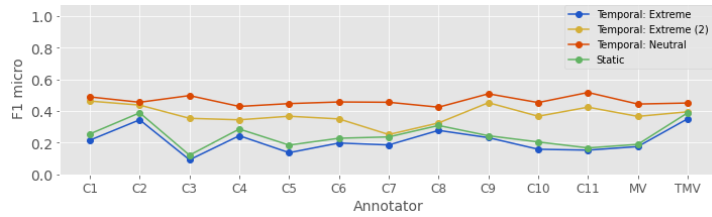

**Supplementary Figure 1. Comparison of the RF classifiers' external validation performance on static vs temporal HiRID validation datasets.**

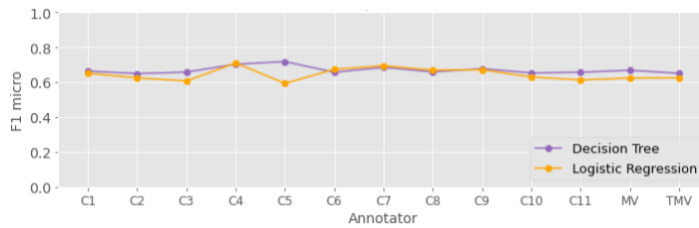

**Supplementary Figure 2. Internal validation performance of the supervised DT and LR models trained on temporal HiRID dataset with predicted labels.**

| Annotator | Internal Val. | External Val. |
|-----------|---------------|---------------|
|           | F1 micro      | F1 micro      |
| C1        | 0.62          | 0.13          |
| C2        | 0.67          | 0.51          |
| C3        | 0.57          | 0.24          |
| C4        | 0.63          | 0.40          |
| C5        | 0.57          | 0.22          |
| C6        | 0.53          | 0.21          |
| C7        | 0.57          | 0.28          |
| C8        | 0.78          | 0.41          |
| C9        | 0.50          | 0.27          |
| C10       | 0.57          | 0.15          |
| C11       | 0.57          | 0.15          |
| MV        | 0.63          | 0.31          |
| TMV       | 0.65          | 0.44          |

| Annotator | Internal Val. | External Val. |
|-----------|---------------|---------------|
|           | F1 micro      | F1 micro      |
| C1        | 0.38          | 0.45          |
| C2        | 0.67          | 0.57          |
| C3        | 0.55          | 0.34          |
| C4        | 0.55          | 0.34          |
| C5        | 0.38          | 0.23          |
| C6        | 0.50          | 0.20          |
| C7        | 0.45          | 0.43          |
| C8        | 0.68          | 0.41          |
| C9        | 0.52          | 0.32          |
| C10       | 0.53          | 0.16          |
| C11       | 0.55          | 0.34          |
| MV        | 0.62          | 0.37          |
| TMV       | 0.55          | 0.32          |

**Supplementary Figure 3. (a) Internal & external validation performance of the supervised XGBoost models, trained on the QEUH datasets. (b) Internal & external validation performance of the supervised SVM models, trained on the QEUH datasets.**
